# Supplementary material for: Discovery of Anti-Inflammatory Triterpenoid Glucosides from the Heritiera littoralis Dryand
Source: MDPI journal article supplement (doi:10.3390/molecules28041658), 2023-02-09
Supplement: s1 [file s1]

## SUPPLEMENTARY MATERIAL

# Discovery of Anti-inflammatory Triterpenoid Glucosides from the *Heritiera littoralis* Dryand.

Xiao qin Liang <sup>2</sup>, Peng Liu<sup>1</sup>, Jun Li <sup>2</sup>, Xinlan Guan <sup>3</sup>, Yanjun Zhang <sup>1\*</sup>, Jian Li <sup>3\*\*</sup>

<sup>1</sup> Guangxi Key Laboratory of Green Chemical Materials and Safety Technology, College of Petroleum and Chemical Engineering, Beibu Gulf University, (Qinzhou 535000)

<sup>2</sup> State Key Laboratory for the Chemistry and Molecular Engineering of Medicinal Resources, School of Chemical & Pharmaceutical Sciences, Guangxi Normal University, Guilin 541004, China

<sup>3</sup> Peoples' Hospital of Pubei, Pubei, 535300, China

\* Correspondence: zhangyj201608@163.com, Tel: 086-0777-2696809; Lj877138@163.com, Tel: 086-0777-8215818.

**Abstract:** Two new triterpenoid glucosides, heritiera A (1) and heritiera B (2), and six known triterpenoid analogs (3-8) were isolated from *Heritiera littoralis* Dryand.. Their structures were identified by comprehensive spectroscopic analyses and comparison with literature. Anti-inflammatory activity of the isolates from *H. littoralis* was evaluated using lipopolysaccharide (LPS) stimulated RAW 264.7 cells model. The result showed that four triterpenoids exhibited potent anti-inflammatory activity. Among these compounds, compound 2 substantially inhibit the release of nitric oxide (NO) with IC<sub>50</sub> value of 10.33  $\mu$ M. The triterpenoids from *H. littoralis* could be used as potential candidates for the development of new anti-inflammatory agents.

**Keywords:** *Heritiera littoralis* Dryand.; heritiera A; heritiera B; anti-inflammatory

## List of supporting information

|                                                                                                                                                 |    |
|-------------------------------------------------------------------------------------------------------------------------------------------------|----|
| Figure S1. HRESIMS spectrum of compound <b>1</b> .....                                                                                          | 1  |
| Figure S2. <sup>1</sup> H NMR (600 MHz, Pyridine- <i>d</i> <sub>5</sub> ) spectrum of compound <b>1</b> .....                                   | 1  |
| Figure S3. <sup>13</sup> C NMR (125 MHz, Pyridine- <i>d</i> <sub>5</sub> ) spectrum of compound <b>1</b> .....                                  | 2  |
| Figure S4. DEPT (125 MHz, Pyridine- <i>d</i> <sub>5</sub> ) spectrum of compound <b>1</b> .....                                                 | 2  |
| Figure S5. <sup>1</sup> H- <sup>1</sup> H COSY (600 MHz, Pyridine- <i>d</i> <sub>5</sub> ) spectrum of compound <b>1</b> .....                  | 3  |
| Figure S6. HSQC spectrum of compound <b>1</b> .....                                                                                             | 3  |
| Figure S7. HMBC spectrum of compound <b>1</b> .....                                                                                             | 4  |
| Figure S8. ROESY spectrum of compound <b>1</b> .....                                                                                            | 4  |
| Figure S9. HRESIMS spectrum of compound <b>2</b> .....                                                                                          | 5  |
| Figure S10. <sup>1</sup> H NMR (600 MHz, Pyridine- <i>d</i> <sub>5</sub> ) spectrum of compound <b>2</b> .....                                  | 5  |
| Figure S11. <sup>13</sup> C NMR (125 MHz, Pyridine- <i>d</i> <sub>5</sub> ) spectrum of compound <b>2</b> .....                                 | 6  |
| Figure S12. DEPT (125 MHz, Pyridine- <i>d</i> <sub>5</sub> ) spectrum of compound <b>2</b> .....                                                | 6  |
| Figure S13. <sup>1</sup> H- <sup>1</sup> H COSY (600 MHz, Pyridine- <i>d</i> <sub>5</sub> ) spectrum of compound <b>2</b> .....                 | 7  |
| Figure S14. HSQC spectrum of compound <b>2</b> .....                                                                                            | 7  |
| Figure S15. HMBC spectrum of compound <b>2</b> .....                                                                                            | 8  |
| Figure S16. ROESY spectrum of compound <b>2</b> .....                                                                                           | 8  |
| Figure S17. The structures of compounds <b>1-8</b> from <i>H. littoralis</i> .....                                                              | 9  |
| Figure S18. <sup>1</sup> H- <sup>1</sup> H COSY (blue bold bonds) and key HMBC (red arrows) correlations of <b>1</b> (A) and <b>2</b> (B) ..... | 9  |
| Figure S19. ROESY (double dashed arrows) correlations of <b>1</b> (A) and <b>2</b> (B) .....                                                    | 9  |
| Figure S20 The flowchart for the isolation procedure of <i>H. littoralis</i> .....                                                              | 10 |

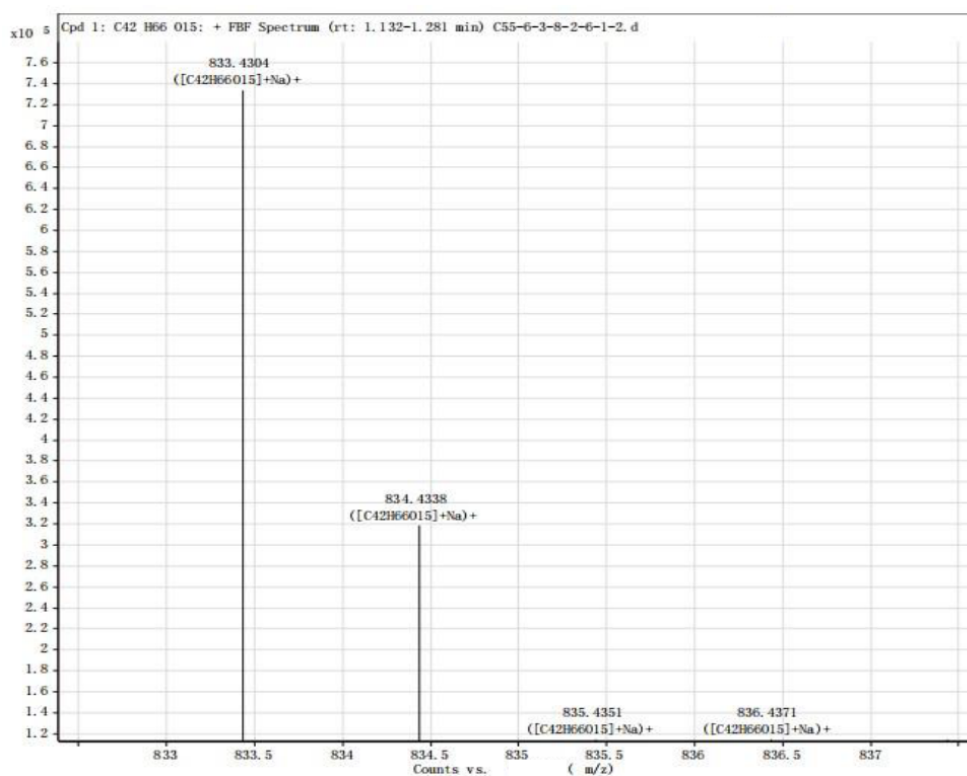

Figure S1. HRESIMS spectrum of compound 1.

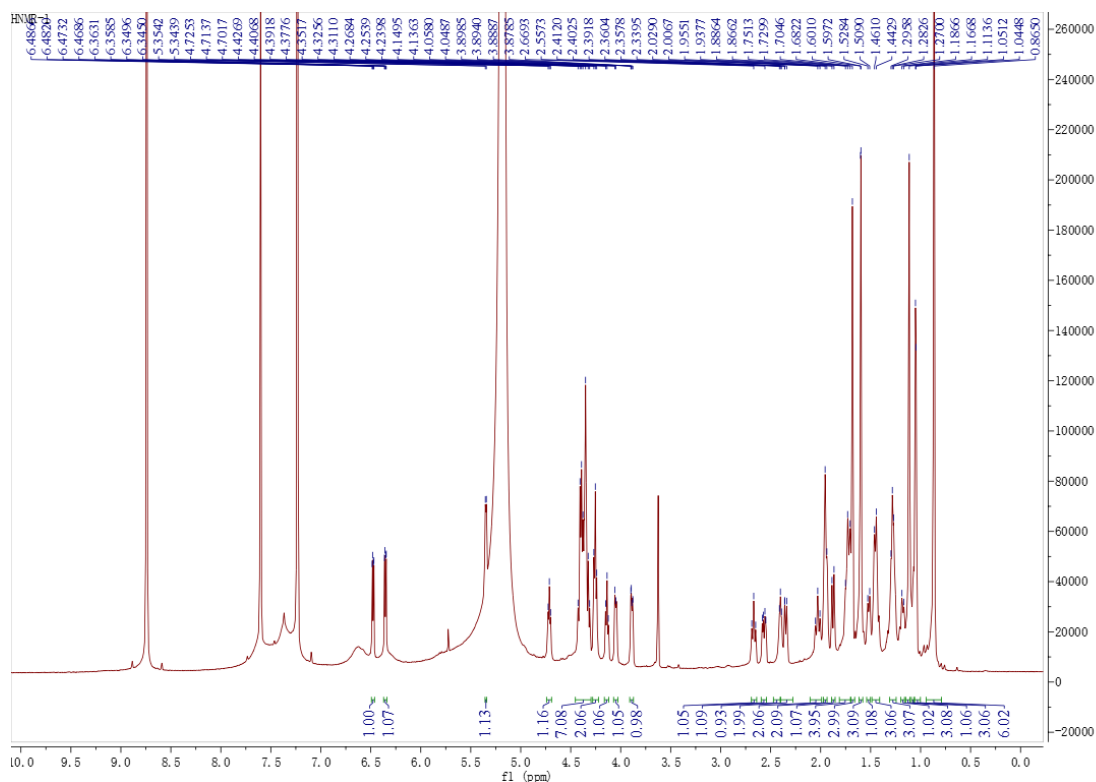

Figure S2.  $^1H$  NMR (600 MHz, Pyridine- $d_5$ ) spectrum of compound 1.

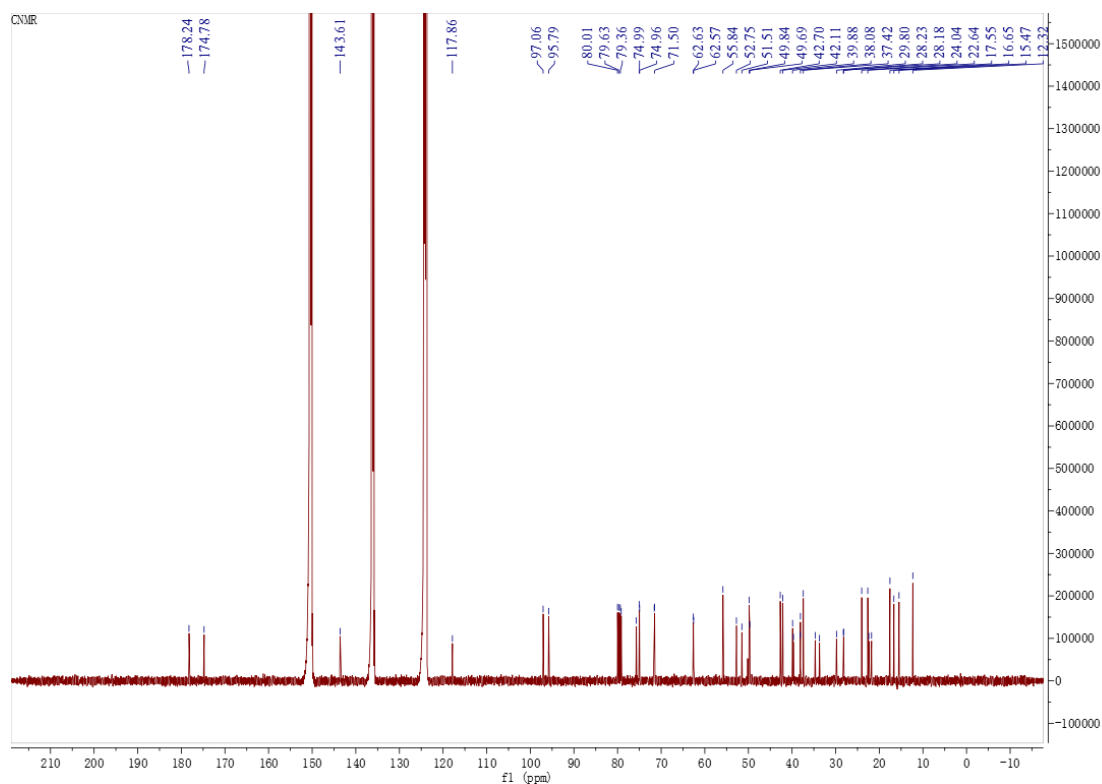

**Figure S3.** <sup>13</sup>C NMR (125 MHz, Pyridine-*d*<sub>5</sub>) spectrum of compound 1.

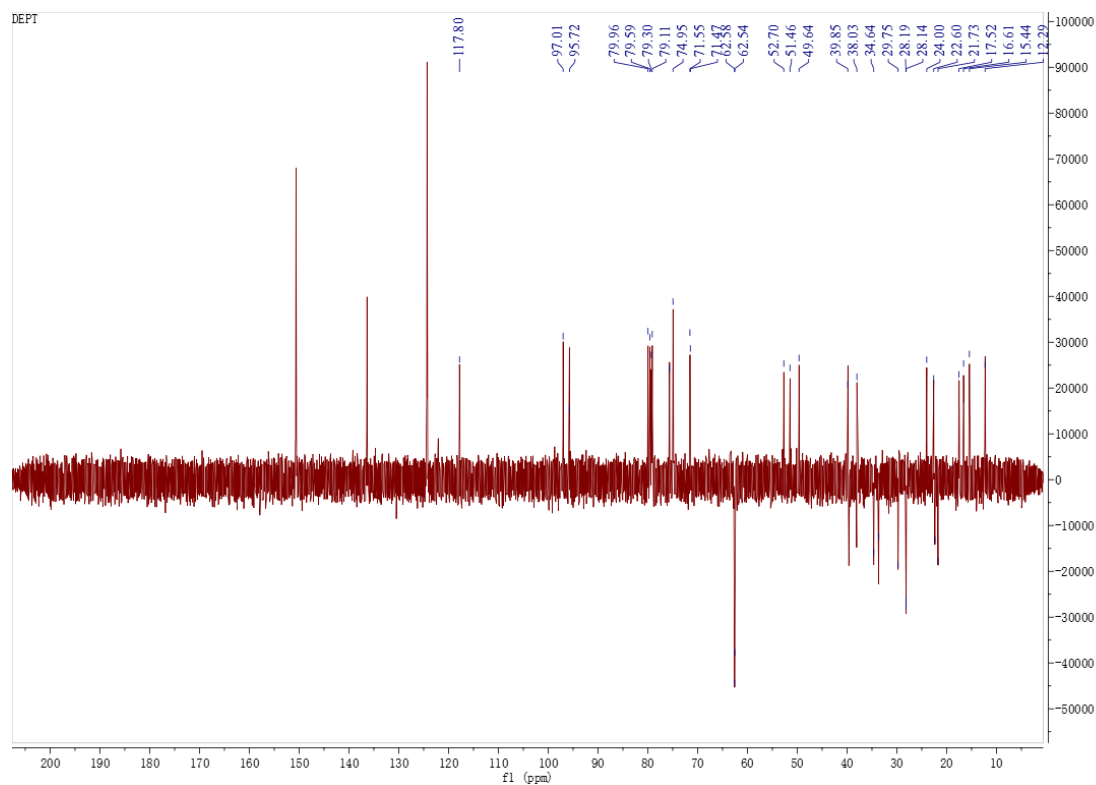

**Figure S4.** DEPT (125 MHz, Pyridine-*d*<sub>5</sub>) spectrum of compound 1.

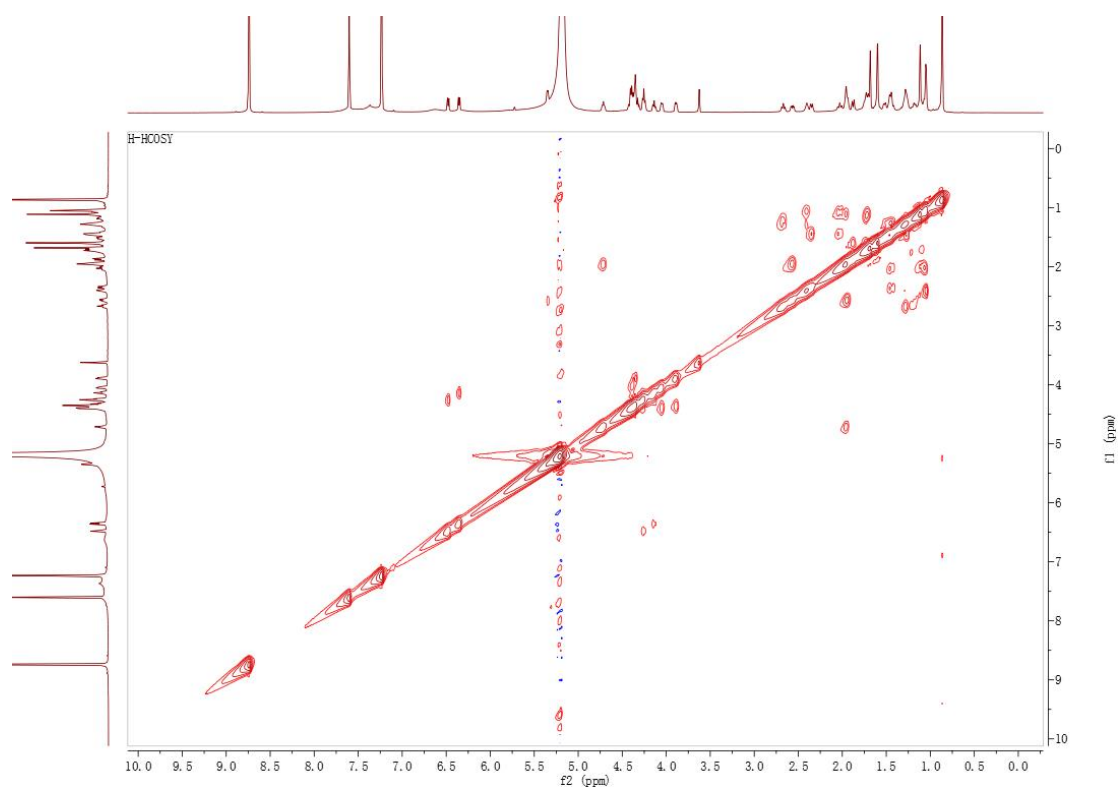

**Figure S5.**  $^1\text{H}$ - $^1\text{H}$  COSY (600 MHz, Pyridine- $d_5$ ) spectrum of compound **1**.

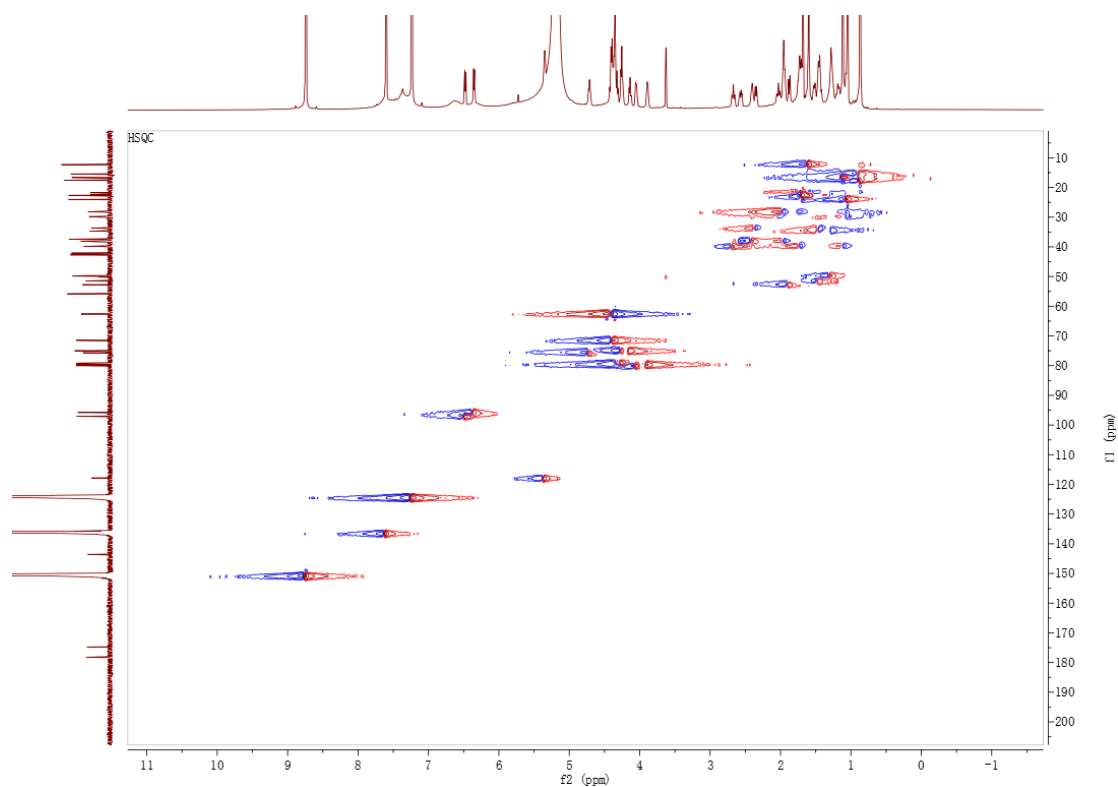

**Figure S6.** HSQC spectrum of compound **1**.

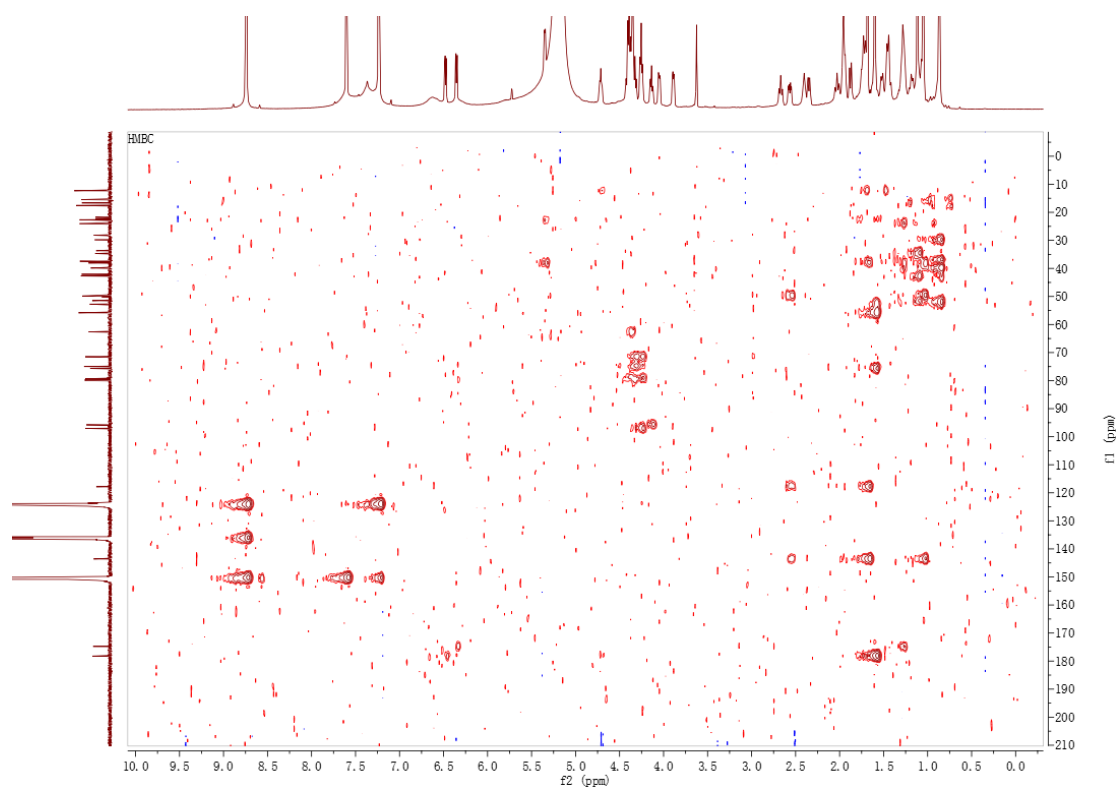

Figure S7. HMBC spectrum of compound 1.

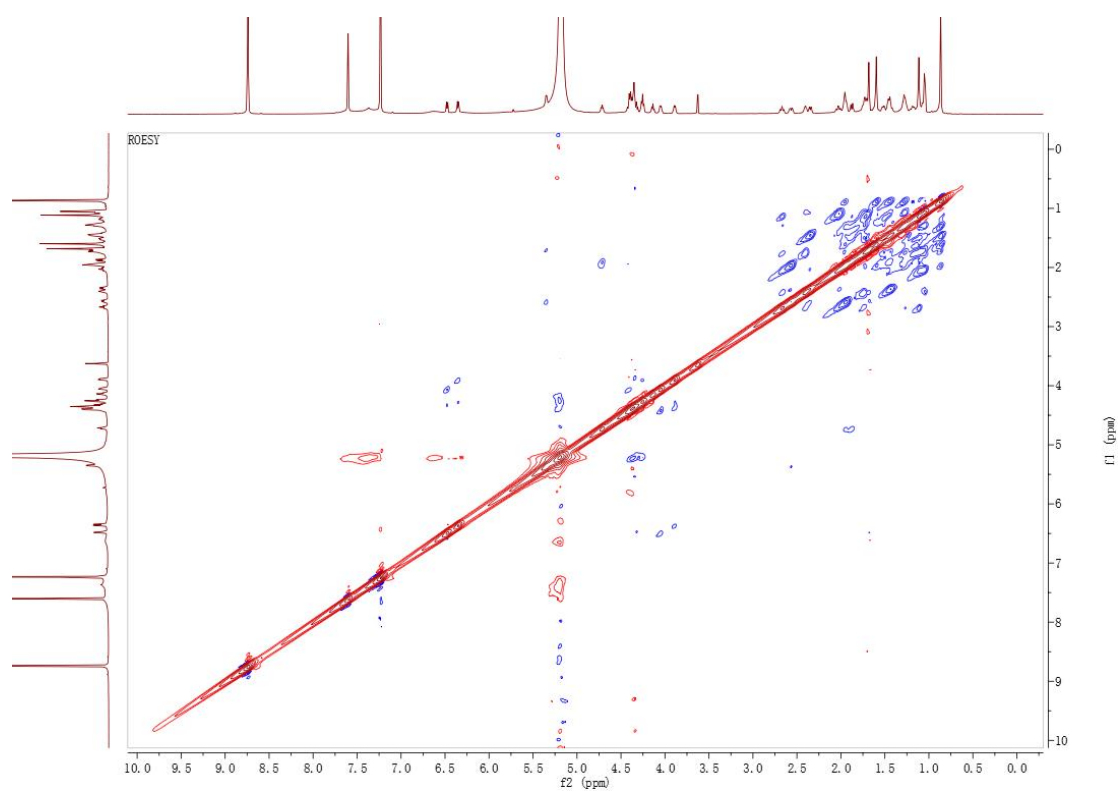

Figure S8. ROESY spectrum of compound 1.



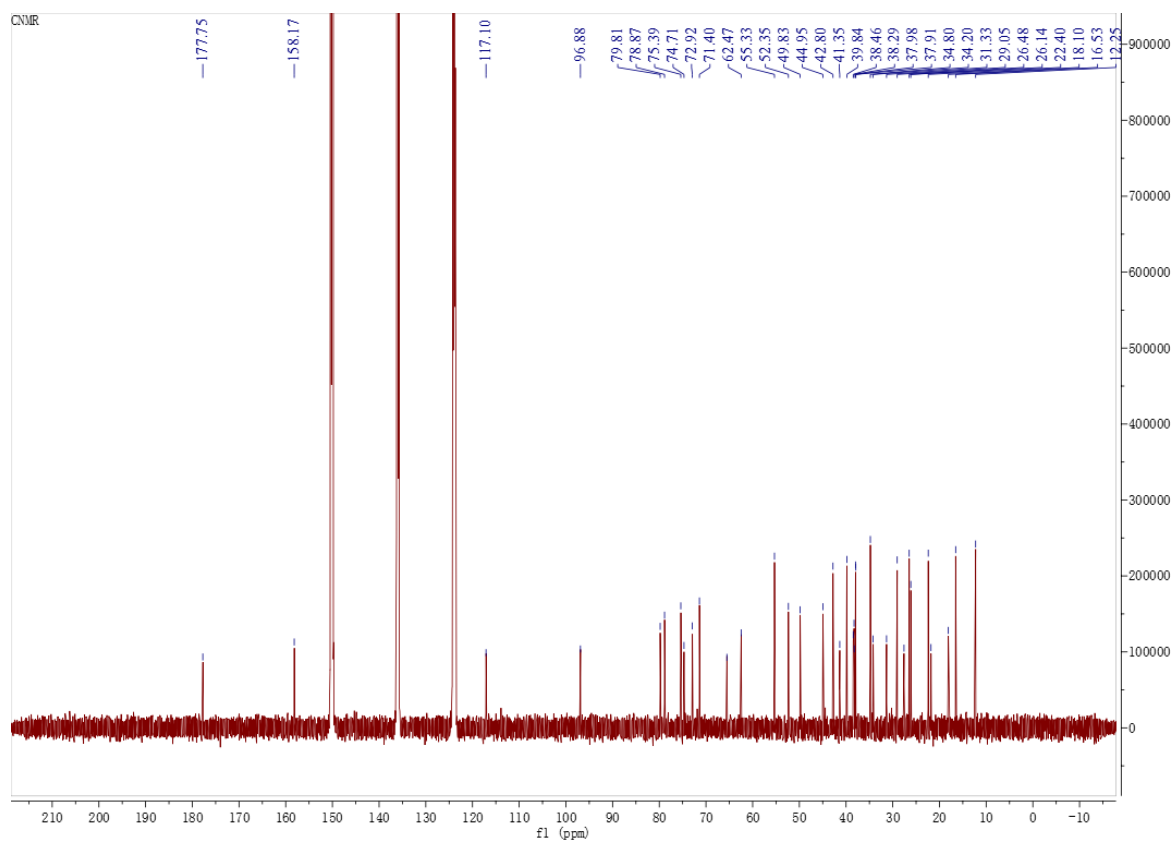

**Figure S11.** <sup>13</sup>C NMR (125 MHz, Pyridine-*d*<sub>5</sub>) spectrum of compound 2.

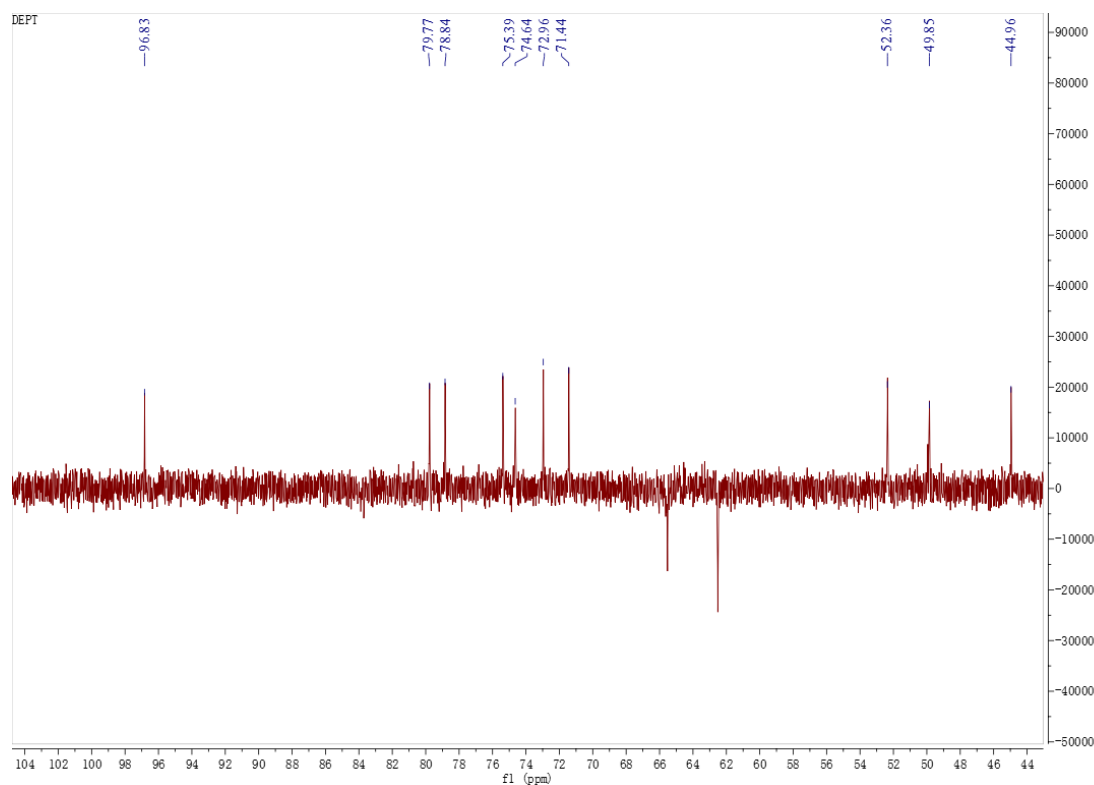

**Figure S12.** DEPT (125 MHz, Pyridine-*d*<sub>5</sub>) spectrum of compound 2.

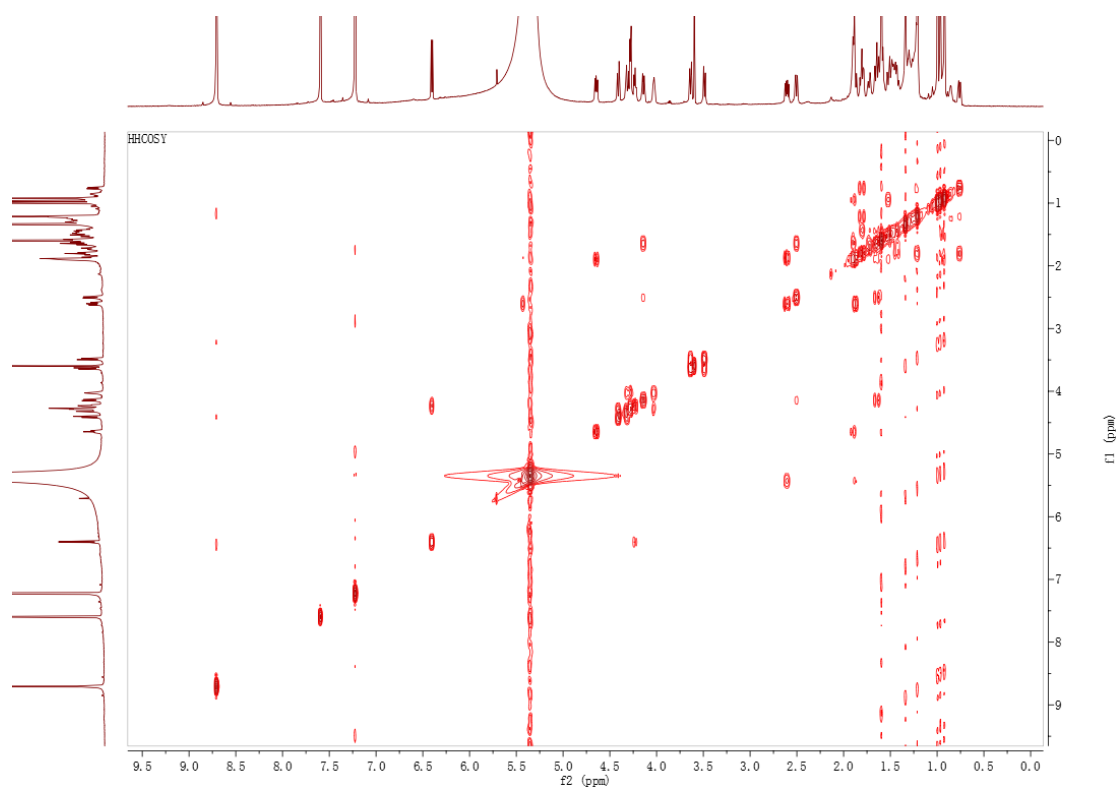

**Figure S13.**  $^1\text{H}$ - $^1\text{H}$  COSY (600 MHz, Pyridine- $d_5$ ) spectrum of compound 2.

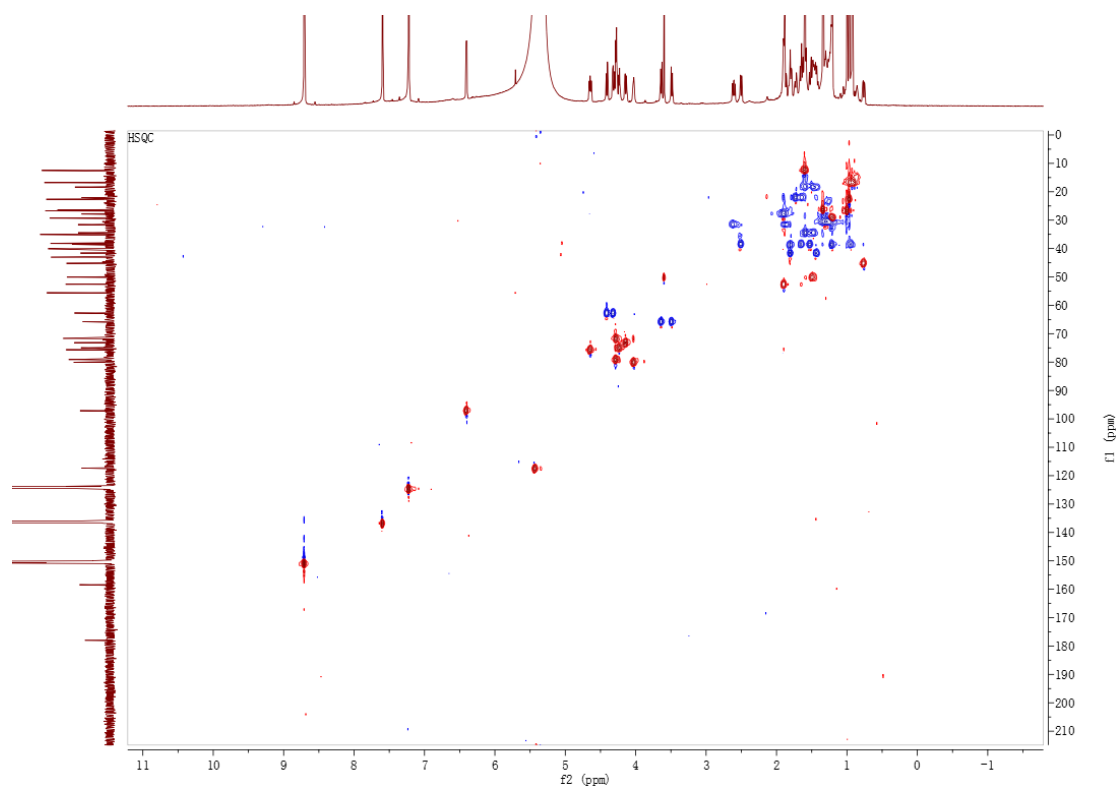

**Figure S14.** HSQC spectrum of compound 2.

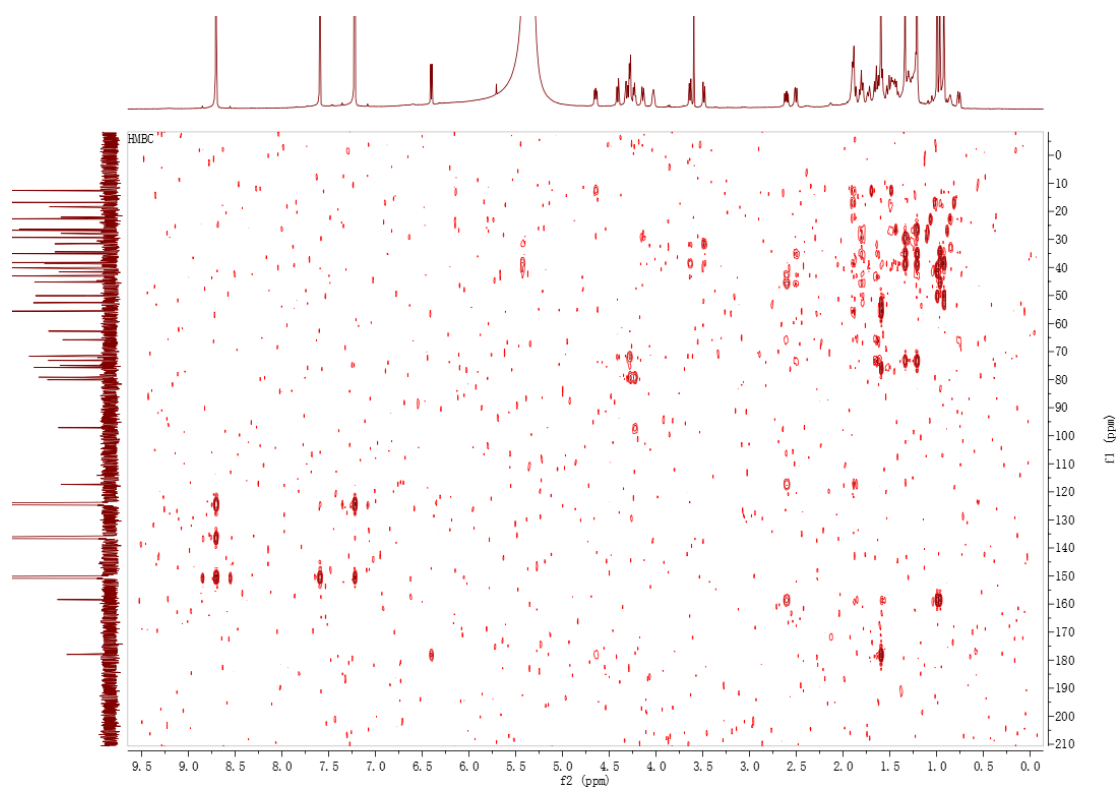

**Figure S15.** HMBC spectrum of compound 2.

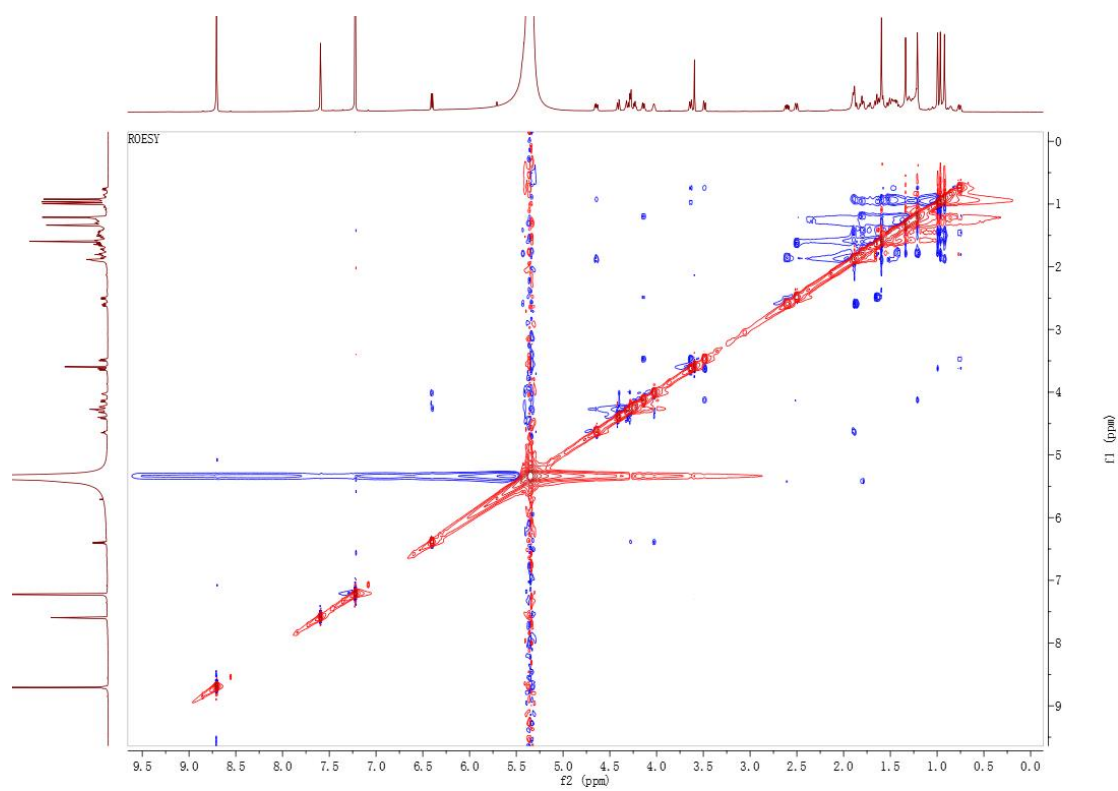

**Figure S16.** ROESY spectrum of compound 2.

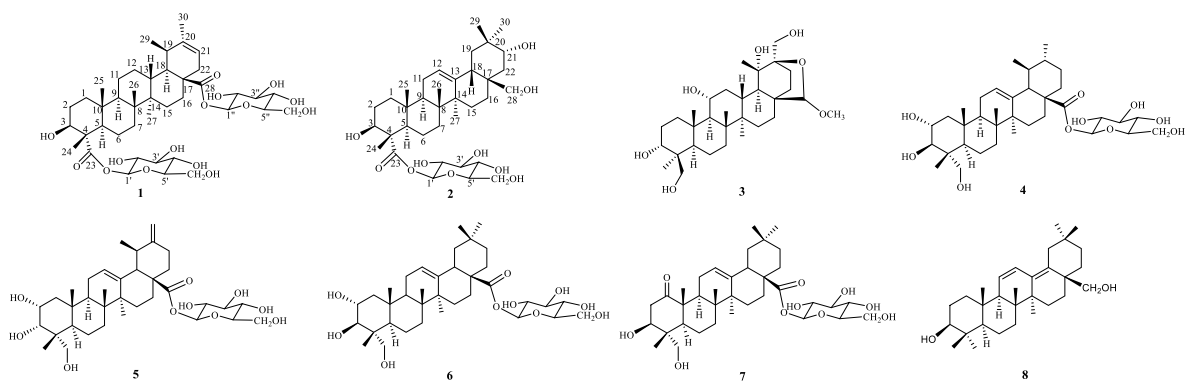

**Figure S17.** The structures of compounds 1-8 from *H. littoralis*.

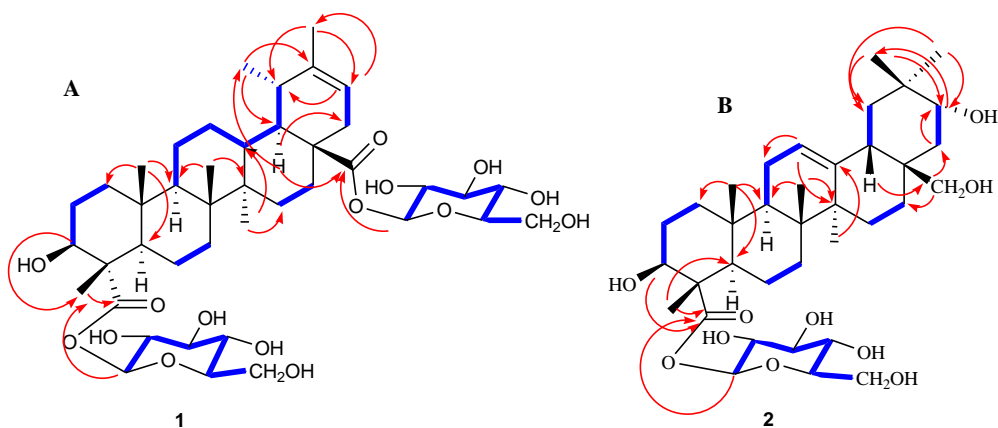

**Figure S18.**  $^1\text{H}$ - $^1\text{H}$  COSY (blue bold bonds) and key HMBC (red arrows) correlations of 1 (A) and 2 (B).

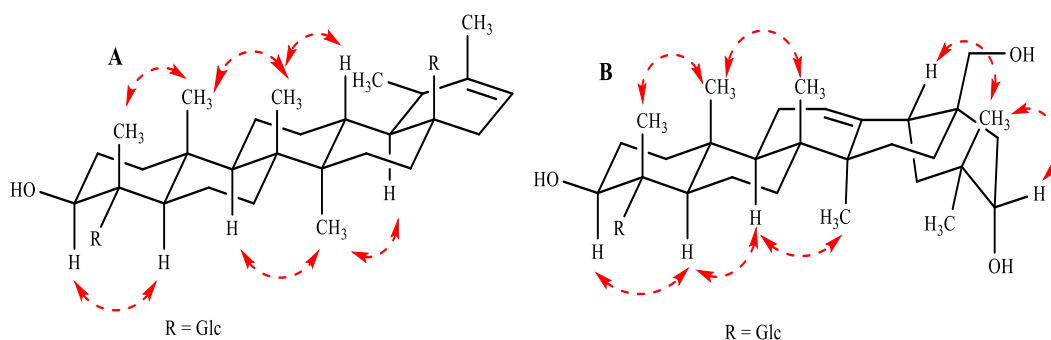

**Figure S19.** ROESY (double dashed arrows) correlations of 1 (A) and 2 (B).

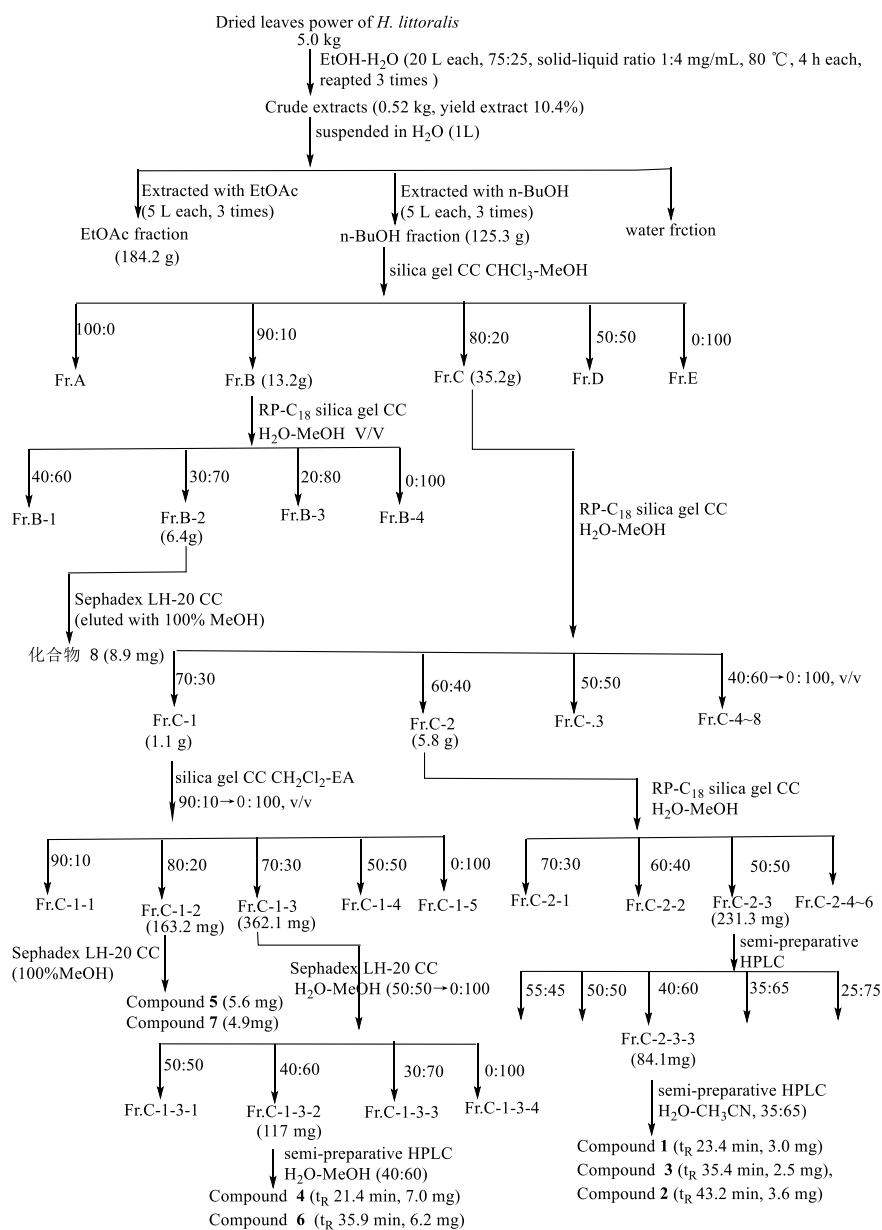

**Figure S20.** The flowchart for the isolation procedure of *H. littoralis*.
